# Supplementary material for: Enhancing and tuning broadband near-infrared (NIR) photoluminescence properties in Cr3+-doped Ca2YHf2Al3O12 garnet phosphors via Ce3+/Yb3+-codoping for LED applications
Source: Royal Society of Chemistry journal article supplement (doi:10.1039/d0tc05657j), 2021-01-01
Supplement: d0tc05657j1.pdf [file d0tc05657j1.pdf]

## Supplementary Information

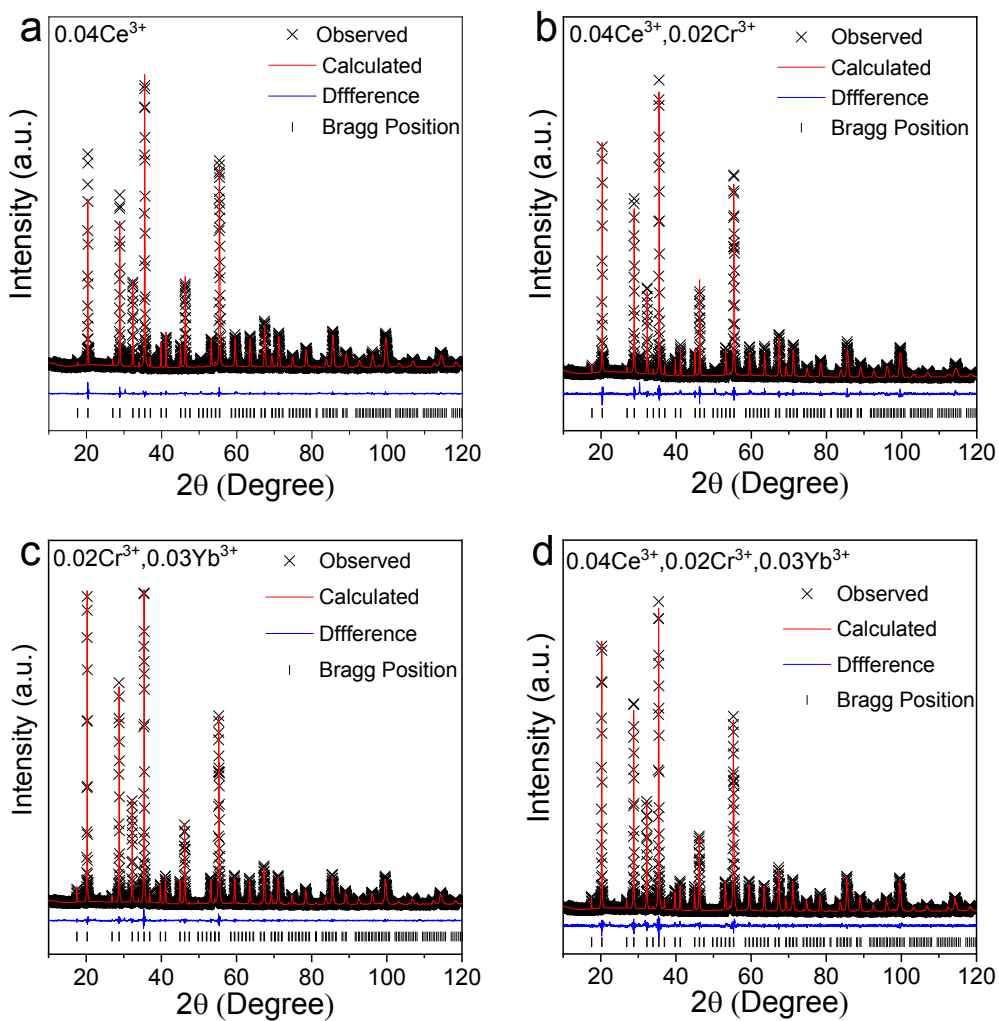

**Figure S1.** XRD refinements of (a) CYHA:0.04Ce<sup>3+</sup>, (b) CYHA:0.04Ce<sup>3+</sup>,0.02Cr<sup>3+</sup>, (c) CYHA:0.02Cr<sup>3+</sup>,0.03Yb<sup>3+</sup>, and (d) CYHA:0.04Ce<sup>3+</sup>,0.02Cr<sup>3+</sup>,0.03Yb<sup>3+</sup>.

**Table S1.** Crystallographic parameters gained from Rietveld refinements for representative CYHA, CYHA:0.04Ce<sup>3+</sup>, CYHA:0.02Cr<sup>3+</sup>, CYHA:0.04Ce<sup>3+</sup>,0.02Cr<sup>3+</sup>, CYHA:0.02Cr<sup>3+</sup>,0.03Yb<sup>3+</sup>, and CYHA:0.04Ce<sup>3+</sup>,0.02Cr<sup>3+</sup>,0.03Yb<sup>3+</sup> samples.

|                                             | CYHA                        | Ce <sup>3+</sup> | Cr <sup>3+</sup> | Ce <sup>3+</sup> ,Cr <sup>3+</sup> | Cr <sup>3+</sup> , Yb <sup>3+</sup> | Ce <sup>3+</sup> ,Cr <sup>3+</sup> ,Yb <sup>3+</sup> |
|---------------------------------------------|-----------------------------|------------------|------------------|------------------------------------|-------------------------------------|------------------------------------------------------|
| <b>Crystal system</b>                       | Tetragonal ( <i>Ia-3d</i> ) |                  |                  |                                    |                                     |                                                      |
| <b><math>\alpha = \beta = \gamma</math></b> | 90°                         |                  |                  |                                    |                                     |                                                      |
| <b><math>a = b = c</math> (Å)</b>           | 12.44854(17)                | 12.44837(22)     | 12.4468(4)       | 12.4443(4)                         | 12.448429                           | 12.4510(1)                                           |
| <b><math>V</math> (Å<sup>3</sup>)</b>       | 1929.10(5)                  | 1929.02(6)       | 1928.31(12)      | 1927.11(10)                        | 1929.05                             | 1930.15                                              |
| <b><math>R_{wp}</math> (%)</b>              | 7.66                        | 7.48             | 7.11             | 6.65                               | 5.41                                | 4.87                                                 |
| <b><math>R_p</math> (%)</b>                 | 5.51                        | 5.02             | 5.18             | 4.73                               | 3.91                                | 3.70                                                 |
| <b><math>\chi^2</math></b>                  | 4.331                       | 4.464            | 2.768            | 3.724                              | 3.556                               | 2.060                                                |

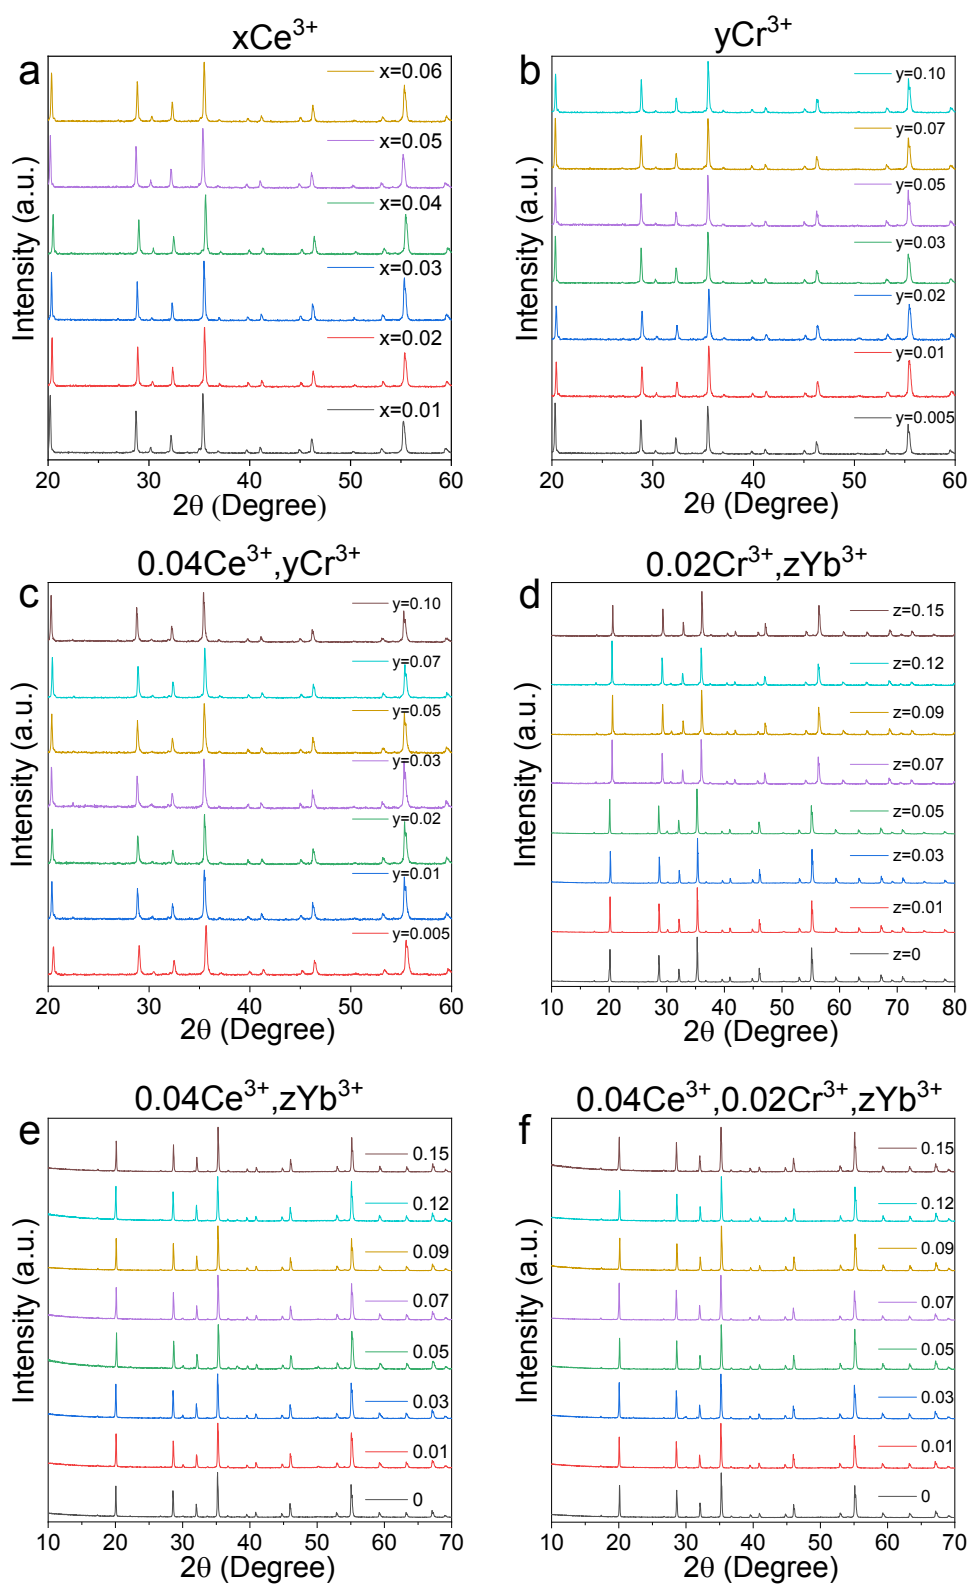

**Figure S2.** XRD patterns of (a) CYHA: $x\text{Ce}^{3+}$  ( $0 \leq x \leq 0.06$ ), (b) CYHA: $y\text{Cr}^{3+}$  ( $0.005 \leq y \leq 0.10$ ), (c) CYHA: $0.04\text{Ce}^{3+}, y\text{Cr}^{3+}$  ( $0.005 \leq y \leq 0.10$ ), (d) CYHA: $0.02\text{Cr}^{3+}, z\text{Yb}^{3+}$  ( $0 \leq z \leq 0.15$ ), (e) CYHA: $0.04\text{Ce}^{3+}, z\text{Yb}^{3+}$  ( $0 \leq z \leq 0.15$ ), and (f) CYHA:  $0.04\text{Ce}^{3+}, 0.02\text{Cr}^{3+}, z\text{Yb}^{3+}$  ( $0 \leq z \leq 0.15$ )

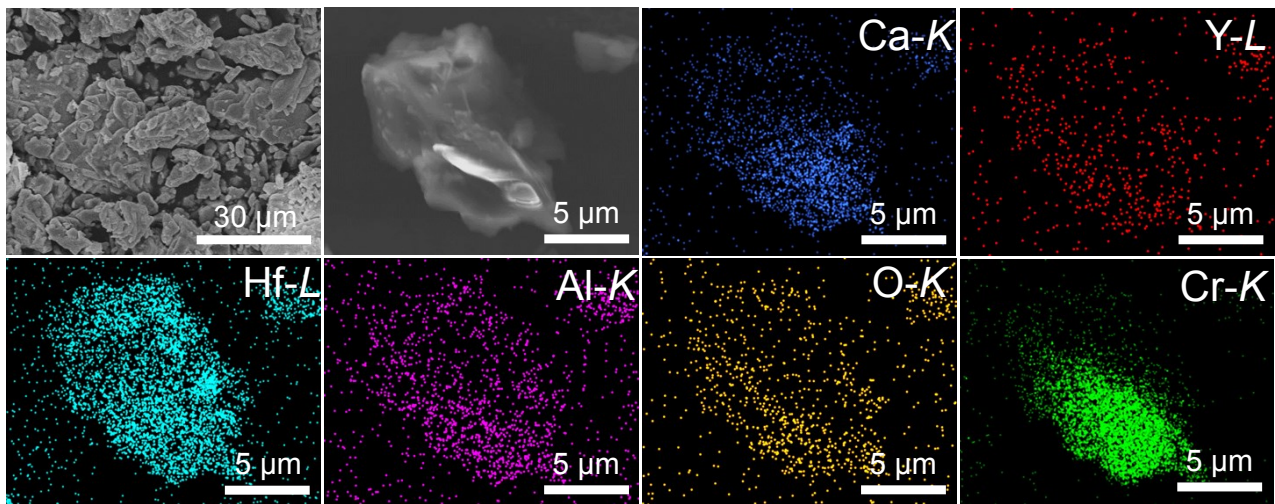

**Figure S3.** SEM and EDS mapping images of CYHA:0.02Cr<sup>3+</sup>. All the elements show uniform distribution.

**Table S2.** Comparison of  $Dq/B$  and PL properties for typical broadband NIR emitting phosphors.

| Phosphors                            | $\lambda_{em}$ (nm) | FWHM (nm) | $Dq/B$ | IQE (%) | I (T = 150 °C) | Ref.      |
|--------------------------------------|---------------------|-----------|--------|---------|----------------|-----------|
| $Y_2CaAl_4SiO_{12}:0.06Cr^{3+}$      | 744                 | 160       | 2.43   | 75.9    | ~80%           | 1         |
| $Ca_3Sc_2Si_3O_{12}:0.06Cr^{3+}$     | 770                 | 110       | 2.74   | 92.3    | 97.4%          | 2         |
| $Ca_2YHf_2Al_3O_{12}:0.02Cr^{3+}$    | 775                 | 137       | 2.27   | 75      | 80%            | This work |
| $Ca_2LuScGa_2Ge_2O_{12}:0.02Cr^{3+}$ | 800                 | 150       | 1.97   | -       | 59%            | 3         |
| $ScBO_3:0.02Cr^{3+}$                 | 800                 | 120       | 2.15   | 65      | ~51%           | 4         |
| $La_2MgZrO_6:0.02Cr^{3+}$            | 825                 | 210       | 2.53   | 58      | <53%           | 5         |
| $MgTa_2O_6:0.21Cr^{3+}$              | 834                 | 140       | 2.50   | -       | -              | 6         |
| $LiInSi_2O_6:0.06Cr^{3+}$            | 840                 | 143       | 1.75   | 75      | 77%            | 7         |
| $LiScP_2O_7:0.06Cr^{3+}$             | 880                 | 170       | 1.84   | 38      | ~20%           | 8         |

**Table S3.** Photoelectric properties of the pc-LEDs with CYHA phosphors

|                                                                                 | Input electrical power (mW) | 400-1100 nm optical power (mW) | 400-1100 nm photoelectric efficiency (%) | 650-1100 nm optical power (mW) | 650-1100 nm photoelectric efficiency (%) |
|---------------------------------------------------------------------------------|-----------------------------|--------------------------------|------------------------------------------|--------------------------------|------------------------------------------|
| 460 nm Chip<br>0.02Cr <sup>3+</sup>                                             | 52.1 (20 mA)                | 3.856                          | 7.40                                     | 2.71                           | 5.20                                     |
| 460 nm Chip<br>0.02Cr <sup>3+</sup> ,0.03Yb <sup>3+</sup>                       | 52.06 (20 mA)               | -                              | -                                        | 3.18                           | 6.1                                      |
| 405 nm Chip<br>0.04Ce <sup>3+</sup> ,0.02Cr <sup>3+</sup> ,0.03Yb <sup>3+</sup> | 58.92 (20 mA)               | 1.841                          | 3.12                                     | 1.65                           | 2.79                                     |

## References

1. M. Mao, T. Zhou, H. Zeng, L. Wang, F. Huang, X. Tang and R.-J. Xie, *J. Mater. Chem. C*, 2020, **8**, 1981-1988.
2. Z. Jia, C. Yuan, Y. Liu, X.-J. Wang, P. Sun, L. Wang, H. Jiang and J. Jiang, *Light Sci. Appl.*, 2020, **9**, 86.
3. B. Bai, P. Dang, D. Huang, H. Lian and J. Lin, *Inorg. Chem.*, 2020, **59**, 13481-13488.
4. Q. Shao, H. Ding, L. Yao, J. Xu, C. Liang and J. Jiang, *RSC Adv.*, 2018, **8**, 12035-12042.
5. H. Zeng, T. Zhou, L. Wang and R.-J. Xie, *Chem. Mater.*, 2019, **31**, 5245-5253.
6. G. Liu, M.S. Molokeev, B. Lei and Z. Xia, *J. Mater. Chem. C*, 2020, **8**, 9322-9328.
7. X. Xu, Q. Shao, L. Yao, Y. Dong and J. Jiang, *Chem. Eng. J.*, 2020, **383**, 123108.
8. L. Yao, Q. Shao, S. Han, C. Liang and J. He, J. Jiang, *Chem. Mater.*, 2020, **32**, 2430-2439.
